1 **A locomotor neural circuit persists and functions similarly in larvae and adult *Drosophila***

2  
3 Kristen M. Lee<sup>1</sup> and Chris Q. Doe<sup>1\*</sup>

4  
5 <sup>1</sup>Institute of Neuroscience, Howard Hughes Medical Institute, University of Oregon, Eugene, OR 97403

6  
7 \* Author for correspondence at [cdoe@uoregon.edu](mailto:cdoe@uoregon.edu)

8  
9 Key words: locomotion, neural circuit, crawling, walking, metamorphosis, neuronal remodeling

10  
11  
12 **Abstract**

13  
14 Individual neurons can undergo drastic structural changes, known as neuronal remodeling or structural  
15 plasticity. One example of this is in response to hormones, such as during puberty in mammals or  
16 metamorphosis in insects. However, in each of these examples it remains unclear whether the remodeled  
17 neuron resumes prior patterns of connectivity, and if so, whether the persistent circuits drive similar  
18 behaviors. Here, we utilize a well-characterized neural circuit in the *Drosophila* larva: the Moonwalking  
19 Descending Neuron (MDN) circuit. We previously showed that larval MDN induces backward crawling, and  
20 synapses onto the Pair1 interneuron to inhibit forward crawling (Carreira-Rosario et al., 2018). MDN is  
21 remodeled during metamorphosis and regulates backward walking in the adult fly. We investigated whether  
22 Pair1 is remodeled during metamorphosis and functions within the MDN circuit during adulthood. We  
23 assayed morphology and molecular markers to demonstrate that Pair1 is remodeled during metamorphosis  
24 and persists in the adult fly. In the adult, optogenetic activation of Pair1 resulted in arrest of forward  
25 locomotion, similar to what is observed in larvae. MDN and Pair1 are also synaptic partners in the adult,  
26 showing that the MDN-Pair1 interneuron circuit is retained in the adult following hormone-driven pupal  
27 remodeling. Thus, the MDN-Pair1 neurons are an interneuronal circuit – i.e. a pair of synaptically connected  
28 interneurons – that persists through metamorphosis, taking on new input/output neurons, yet generating  
29 similar locomotor behavior at both stages.  
30

## 31 Introduction

32  
33 Large-scale changes in neuronal morphology and function occur during mammalian puberty (Barendse et al.,  
34 2018; Mills et al., 2016; Sisk and Zehr, 2005), as well as several neurobiological disorders including depression  
35 (Patel et al., 2019), or chronic pain (Kuner and Flor, 2017). Similarly, major changes in neuronal numbers and  
36 type occur as a result of insect metamorphosis (Kanamori et al., 2015; Truman and Reiss, 1976; Yaniv and  
37 Schuldiner, 2016). Despite these changes, there are documented cases of individual insect neurons persisting  
38 from larval to adult stages. In *Drosophila*, individual motor and sensory neurons have been shown to persist  
39 throughout metamorphosis and undergo dramatic remodeling (Consoulas et al., 2002, 2000; Yaniv and  
40 Schuldiner, 2016; Yu and Schuldiner, 2014). Similar findings have been reported for the insect mushroom  
41 body, where Kenyon cells partners (projection neurons, DANs) exist at both larval and adult stages (Li et al.,  
42 2020; Marin et al., 2005). Yet, it remains unclear whether the remodeled neurons re-establish connectivity  
43 with the identical neurons in the larva and adult.

44 During *Drosophila* metamorphosis the animal changes from a crawling limbless larva to a walking six-  
45 legged adult (Riddiford, 1980; Riddiford et al., 2003). Despite the obvious differences, some behaviors are  
46 similar: both larvae and adults undergo forward locomotion in search of food, backward locomotion in  
47 response to noxious stimuli, and pausing in between antagonistic behaviors (Carreira-Rosario et al., 2018). We  
48 and others identified a neuron that, when activated, can trigger backward locomotion in both larvae and  
49 adults (Bidaye et al., 2014; Carreira-Rosario et al., 2018; Sen et al., 2017), despite the obvious differences in  
50 limbless and six-legged locomotion. This neuron, named Moonwalker/Mooncrawler Descending Neuron  
51 (MDN) is present in two bilateral pairs per brain lobe, with all four MDNs having similar synaptic partners,  
52 and all four MDNs capable of eliciting backward larval locomotion in larvae (Carreira-Rosario et al., 2018).  
53 Larval MDNs induce backward locomotion via the coordinate arrest of forward locomotion followed by the  
54 initiation of backward locomotion. Halting forward locomotion is done via activation of the Pair1 descending  
55 interneuron, which inhibits the A27h premotor neuron, to prevent it from inducing forward locomotion  
56 (Carreira-Rosario et al., 2018). Activating backward locomotion is likely to be due, in part, to MDN activation  
57 of the A18b premotor neuron, which is specifically active during backward locomotion (Carreira-Rosario et  
58 al., 2018). Thus, MDN-Pair1 are synaptically coupled members of a locomotor circuit in the *Drosophila* larva.

59 Here we follow our previous work showing that MDN is remodeled during metamorphosis and persists  
60 into the adult (Carreira-Rosario et al., 2018) by asking: Is the MDN partner neuron Pair1 also maintained in  
61 the adult? Does the adult Pair1 induce an inhibition in forward locomotion, similar to its role in larvae? And,  
62 are the adult Pair1 and MDN synaptically coupled? We find that all of these questions are answered in the  
63 affirmative, showing that the core MDN-Pair1 decision-making circuit (a pair of synaptically-connected  
64 interneurons) persists from larva to adult, despite profound remodeling during metamorphosis, and that this  
65 circuit coordinates forward/backward locomotion in both larvae and adults.

## 66 Results

### 67 The Pair1 neuron persists from larval to adult stages

68  
69 To determine if Pair1 neurons were present in the adult, we mapped expression of a Pair1-Gal4 line (*R75C02-  
70 Gal4*) from early larval to adult stages. We identified the larval Pair1 neurons based on their characteristic cell  
71 body position in the medial subesophageal zone (SEZ), dense local ipsilateral dendritic arborizations (defined  
72 as dendritic based on enrichment for post-synapses in the TEM reconstruction of the larval Pair1 neuron;  
73 [Figure 1 – supplement 1](#)), and contralateral axons descending into the ventral nerve cord (VNC) in an  
74 extremely lateral axon tract (Carreira-Rosario et al., 2018). Using the Pair1-Gal4 line, we could identify Pair1  
75

76 neurons with this morphology at 28h and 96h after larval hatching (ALH; [Figure 1A,B](#)). The Pair1 neuron cell  
77 bodies and proximal neurites could still be observed at 24 hrs after pupal formation (APF), but virtually all of  
78 the dendritic processes and descending axonal process had been pruned ([Figure 1C](#), only one neuron  
79 labeled). This is expected, given that many or all neurons undergo axon/dendrite remodeling during  
80 metamorphosis (Kanamori et al., 2015; Truman and Reiss, 1976; Yaniv and Schuldiner, 2016). At 48 hrs APF,  
81 Pair1 neurons exhibited dendritic branching in the SEZ and a descending axon into the VNC, regaining  
82 morphological features similar to that of larval Pair1 neurons ([Figure 1D](#)). The axon innervated the T1  
83 (prothoracic) neuropil and descended further down the VNC. These morphological features were maintained  
84 into the adult fly, where we could trace the Pair1 axon to primarily innervate the T1 neuropil ([Figure 1E](#)),  
85 with less extensive innervation of the mesothoracic (T2) and metathoracic (T3) neuropils.

86 Although we can use the Pair1-Gal4 line to track neurons with Pair1 morphological features from  
87 larva to adult, it remains possible that the Gal4 line switches off in Pair1 and switches on in a similar  
88 descending neuron at a stage in between those we assayed. To conclusively demonstrate that the larval Pair1  
89 neuron survives into adulthood, we used a genetic technique to permanently label or “immortalize” the larval  
90 Pair1 neurons and assay for their presence in the adult brain. Briefly, the method achieves spatial specificity  
91 by using Pair1-Gal4 to drive UAS-FLP which removes a stop cassette from nSyb-FRT-stop-FRT-LexA  
92 resulting in permanent LexA expression in Pair1-Gal4 neurons; it achieves temporal specificity (e.g. labeling  
93 only larval Pair1-Gal4+ neurons) by using a heat inducible KD recombinase to “open” the lexAop-  
94 KDRTstopKDRT-HA reporter (see Methods for additional details). Thus, a heat shock will permanently  
95 label all Pair1-Gal4+ neurons at the time of heat shock. We immortalized Pair1 neurons in the larva, and  
96 assayed expression in the adult, and observed the two bilateral Pair1 neurons, based on characteristic medial  
97 SEZ cell body position, local ipsilateral arbors and contralateral descending axons that preferentially innervate  
98 the prothoracic neuropil ([Figure 1F](#)). Pair1 innervation is clearer in neurons immortalized during larval  
99 stages, which reduces the off-target neuron expression in the adult VNC, and reveals an greatly enriched level  
100 of innervation in the T1 neuropil ([Figure 1F](#)).

101 The Pair1-Gal4 line is expressed in several off-target neurons in addition to Pair1. One of these, a  
102 sensory neuron from the proboscis, can be reduced from the adult Pair1 pattern by removing the proboscis a  
103 day prior to analysis (see Methods) but is present at the 48 hr APF timepoint ([Figure 1D, E](#)). In addition,  
104 there are off-target neurons that innervate all three thoracic neuropils (T1-T3), obscuring Pair1 innervation  
105 ([Figure 1E](#)). We took advantage of the sparse labeling of the immortalization genetics and found brains that  
106 maintained preferential targeting of Pair1 to the prothoracic neuropil but lacked T1-T3 off-target innervation,  
107 confirming that they are indeed off-target neurons ([Figure 1F-F''](#)). We conclude that the Pair1 neurons are  
108 present from larval to adult stages, and that the Pair1 neurons are enriched for postsynaptic partners in the T1  
109 neuromere.

### 111 **Pair1 neurons maintain the same molecular profile from larval to adult stages**

112 If Pair1 neurons persist from larva to adult, they may express the same transcription factor (TF) profile at  
113 both stages. We screened a small collection of TF markers for expression in the larval and adult Pair1  
114 neurons, and in all cases we found identical expression ([Figure 2](#)). Larval and adult Pair1 neurons expressed  
115 Hunchback (Hb), Sex combs reduced (Scr), and Bicoid (Bcd); but did not express Visual system homeobox  
116 (Vsx1) or Nab ([Figure 2](#)). These results support the conclusion that Pair1 persists from larva to adult,  
117 maintaining both molecular and morphological features, and raises the interesting possibility that the three  
118 TFs (Hb, Bcd, Scr) may provide a molecular code that directs both larval and adult Pair1 morphology and/or  
119 connectivity (see Discussion).

120

## 121 **Pair1 activation arrests forward locomotion in adults**

122 We previously showed that larval MDN persists in adults and can induce backward locomotion at both stages  
123 despite the obvious difference in motor output – limbless crawling vs. six-legged walking (Carreira-Rosario et  
124 al., 2018). This raised the question of whether the adult Pair1 neuron also maintains its larval function, i.e. to  
125 pause forward locomotion. To test this hypothesis, we used Pair1-Gal4 to express the red light-gated cation  
126 channel CsChrimson (Chrimson) to activate Pair1 neurons in the adult. Experimental flies were fed all-*trans*  
127 retinal (ATR; required for Chrimson function) whereas control flies were fed vehicle only.

128 Control flies exposed to red light did not pause or arrest forward locomotion, did not show an  
129 increased probability of pausing, and did not have a decrease in distance traveled during the stimulus interval.  
130 In contrast, experimental flies expressing Chrimson in Pair1 neurons showed a near complete arrest of  
131 forward locomotion, an increased probability of pausing, and a reduced distance traveled during the stimulus  
132 interval (Figure 3A-C; Figure 3 - Supplement 1). These effects were reversed after turning off the red light,  
133 with the exception of a slightly reduced distance travelled, likely due to a lingering physiological effect of the  
134 30 sec Pair1 activation (Figure 3A,C). Pair1 activation resulted in an increase in immobile flies (Figure 3E)  
135 and a corresponding decrease in whole body translocation (defined as “large movements”, Figure 3F).  
136 Importantly, Pair1 activation did not prevent small body part movements such as those involved in grooming  
137 (defined as “small movements”, Figure 3G). Note that Pair1-Gal4 off-target expression is common but  
138 variable from fly to fly, whereas its expression in Pair1 neurons is fully penetrant; because the Chrimson-  
139 induced behavior is also fully penetrant, we conclude that the arrest in forward locomotion is due to  
140 Chrimson activation of the Pair1 neurons. We conclude that Pair1 activation prevents a single behavior –  
141 forward locomotion – but does not produce general paralysis or interfere with non-translocating limb  
142 movements.

## 143 **MDN and Pair1 are synaptic partners during adulthood**

144 Given that MDN and Pair1 are synaptic partners in the larvae (Figure 1 - Supplement 1), MDN and Pair1  
145 persist into adulthood (Figure 1 and 2), and MDN and Pair1 both regulate the same behavior in larvae and  
146 adults (Figure 3) (Carreira-Rosario et al., 2018), we hypothesized that MDN and Pair1 may also be synaptic  
147 partners during adulthood. To test this hypothesis, we used the MDN-LexA and Pair1-Gal4 to label MDN  
148 and Pair1 neurons individually in the same animal (Figure 4A,B). We observed MDN and Pair1 neurites in  
149 close proximity to each other (Figure 4C-E). To determine if MDN and Pair1 are synaptic partners in this  
150 region of neuropil, we utilized t-GRASP (targeted GFP reconstitution across synaptic partners), an activity-  
151 independent method to label synaptic contact sites (Shearin et al., 2018). Control flies only expressing pre-t-  
152 GRASP in MDN did not have detectable t-GRASP signal (Figure 4F). However, flies expressing pre-t-  
153 GRASP in MDN and post-t-GRASP in Pair1 had t-GRASP signal, indicating that MDN and Pair1 form  
154 synapses (Figure 4G). We conclude that MDN and Pair1 are synaptic partners during adulthood.

## 155 **Discussion**

156  
157  
158  
159 Together with our earlier work (Carreira-Rosario et al., 2018), our results here show that a core decision-  
160 making circuit is preserved from larval stages into the adult. This decision-making circuit contains MDN and  
161 its monosynaptically-coupled Pair1 neuron, allowing the fly to switch between antagonistic behaviors:  
162 forward versus backward locomotion. Our work raises several interesting questions: Do many other larval  
163 neural circuits persist and have similar function in adults? Are the cues that establish MDN-Pair1 connectivity  
164 in the larvae also used to re-establish MDN-Pair1 connectivity in the adult?

165 How much of the larval MDN-Pair1 circuit is maintained into the adult? The larval circuit contains  
166 the MDN partners Pair1, ThDN, and A18b, and the Pair1 partner A27h (Figure 5). In addition to MDN, we  
167 show here that Pair1 is maintained. There is no Gal4 line or markers for the ThDN neuron, and the only  
168 A18b line has extensive off-target expression, so the fate of these two neurons is unknown. In contrast, the  
169 A27h interneuron, which regulates forward crawling in the larvae, undergoes apoptosis during pupal stages  
170 (data not shown) and thus does not regulate forward walking in the adult. This is not surprising as the A27h  
171 neurons are located in the abdominal segments, which do not have a role in adult walking.

172 How much of the adult MDN-Pair1 circuit is present in the larvae? Recent work mapping the adult  
173 MDN circuit has identified over 30 VNC neurons downstream of MDN, including the LBL40 and LUL130  
174 neurons required for hindleg backward stepping (Figure 5; Feng et al., 2020). Recent work has also identified  
175 adult neurons important for forward walking (Bidaye et al., 2020), but their relationship to adult MDN is  
176 unknown. In the future, it will be interesting to see if any of these adult neurons are present in the larvae,  
177 particularly those regulating forward and backward walking, and determine if they are also MDN or Pair1  
178 target neurons.

179 Elegant recent work has shown that initiation of forward walking requires the forelegs, innervated by  
180 motor neurons in the prothoracic segment, whereas initiation of backward walking requires the hindlegs,  
181 innervated by motor neuron in the metathoracic segment (Feng et al., 2020). This is consistent with our  
182 finding that the adult Pair1 neuron innervates the prothoracic neuropil, a site well-positioned to arrest motor  
183 activity driving foreleg stepping and initiation of forward locomotion. Similarly, adult MDN synaptic partners  
184 primarily innervate the metathoracic neuromere (Feng et al., 2020), a good location for inducing hindleg  
185 stepping and initiation of backward walking. A similar spatial segregation is likely to occur in the larva, where  
186 forward crawling is induced by A27h in posterior segments, and backward crawling is induced in anterior  
187 segments (Fushiki et al., 2016; Tastekin et al., 2018).

188 In larvae, Pair1 activation only causes a pause in forward locomotion – after pausing, the animal  
189 returns to baseline speed regardless of the red-light stimulus duration (Carreira-Rosario et al., 2018; Tastekin  
190 et al., 2018). In contrast, Pair1 activation in adults results in a persistent arrest in forward locomotion for the  
191 duration of the red light stimulus, although non-translocating limb movements are not affected. We speculate  
192 these differences may be due to differences in Pair1 downstream synaptic partners, with more redundancy in  
193 the larval circuit. Understanding the function of the neurons downstream of adult Pair1 in the T1 neuromere  
194 is likely to provide insights into these behavioral differences.

195 Here we identify a transcription factor combination (Hb, Bcd, Scr) that persists in Pair1 neurons  
196 from larvae to adults. It is intriguing to speculate that these transcription factors may be required for cell  
197 surface molecule expression used to establish the MDN-Pair1 synaptic specificity in the embryo as well as to  
198 re-establish MDN-Pair1 synaptic specificity following pupal remodeling. Perhaps these transcription factors  
199 drive expression of the same cell surface molecules at both stages, or even continuously to maintain  
200 functional connectivity.

201 Individual neurons that have similar functions in larva and adults have been identified, including  
202 select motor neurons, sensory neurons (Consoulas et al., 2002, 2000; Levine, 1984; Truman, 1992; Weeks,  
203 2003), and Kenyon cells of the mushroom body (Eichler et al., 2017; Li et al., 2020). However, it remains  
204 unknown whether any of their synaptic partners also persist and retain the same pattern of connectivity. Our  
205 work is the first, to our knowledge, to show that a pair of synaptically connected interneurons – the core of a  
206 decision-making circuit – can persist from larva to adult and perform similar functions at both stages.  
207 Remarkably, both MDN and Pair1 undergo dramatic pruning and regeneration events during metamorphosis,  
208 only to re-form synapses with each other following neuronal remodeling. This suggests that synapse  
209 specificity cues are maintained from the late embryo, where MDN-Pair1 connectivity is first established, into

210 pupal stages, where MDN-Pair1 connectivity is re-established. The importance of the MDN-Pair1 decision-  
211 making circuit is highlighted by its persistence from embryo to adult, despite adapting to different sensory  
212 input and motor output at each stage. Perhaps other descending or ascending interneurons will also persist  
213 into adults, switching inputs and outputs as needed. Indeed, the idea that a core decision-making circuit that  
214 is stable across developmental stages is supported by recent elegant TEM reconstruction of neural circuits at  
215 different stages of *C. elegans* development (Witvliet et al., 2020). Here the authors conclude that "Across  
216 maturation, the decision-making circuitry is maintained whereas sensory and motor pathways are substantially  
217 remodeled." These results, together with ours, raise the possibility that preservation of decision-making  
218 interneuron circuit motifs may be functional modules that can be used adaptively with different sensorimotor  
219 inputs and outputs. The presence of this circuit motif in both flies and worms suggests that it may be an  
220 ancient evolutionary mechanism for assembling sensorimotor circuits.

221

## 222 **Materials and Methods**

223

### 224 Fly husbandry

225 All flies were reared in a 25°C room at 50% relative humidity with a 12 hr light/dark cycle. All comparisons  
226 between groups were based on studies with flies grown, handled and tested together.

227

### 228 Fly Stocks

- 229 1) *R75C02-Gal4* (Pair1 line; BDSC #39886)
- 230 2) *UAS-myr::GFP* (BDSC #32198)
- 231 3) *UAS-CsChrimson::mVenus* (Vivek Jayaraman, Janelia Research Campus)
- 232 4) *VT044845-lexA* (adult MDN line; a gift from B. Dickson, Janelia Research Campus)
- 233 5) *UAS-mCD8::RFP, LexAop-mCD8::GFP;;* (BDSC #32229)
- 234 6) *LexAop-pre-t-GRASP, UAS-post-t-GRASP* (BDSC #79039)
- 235 7) *Hs-KD, 3xUAS-FLP; 13xLexAop(KDRT.Stop)myr:smGdP-Flag/ CyO-YFP ;*  
236 *13xLexAop(KDRT.Stop)myr:smGdP-V5, 13xLexAop(KDRT.Stop)myr:smGdP-HA, nSyb-(FRT.Stop)-*  
237 *LexA::p65/R75C02-Gal4* (line to permanently label Pair1; Doe Lab; modified from (Ren et al., 2016))

238

### 239 Gal4 driver "immortalization"

240 Immortalization flies (see genotype #7, above) were allowed to lay eggs for four hours. Newly hatched larvae  
241 were placed in a food vial, and at 96 hours ALH the food vial was partially submerged in a 37°C water bath  
242 for 5 minutes, allowing the hs-KD to act as a recombinase to remove the KDRT Stop cassette, resulting in  
243 nSyb-LexA driving HA expression permanently in the neurons expressing Pair1-Gal4 at the time of heat  
244 shock (96h ALH). After the heat shock, larvae in the food vial recovered at 18°C for 5 minutes, and then  
245 grown to adulthood at 25°C.

246

### 247 Immunostaining and imaging

248 Standard confocal microscopy and immunocytochemistry methods were performed as previously described  
249 (Carreira-Rosario et al., 2018). Primary antibodies used recognize: GFP (rabbit, 1:500, ThermoFisher,  
250 Waltham, MA; chicken, 1:1500, Abcam12970, Eugene, OR), HA (rat, 1:100, Sigma, St. Louis, MO),  
251 Hunchback (mouse, 1:400, AbcamF18-1G10.2), Sex combs reduced (mouse, 1:10, Developmental Studies  
252 Hybridoma Bank, Iowa City, IA), Bicoid (rat, 1:100, John Reintz, University of Chicago, Illinois), Vsx1  
253 (guinea pig, 1:500, Claude Desplan, NYU, New York), Nab (guinea pig, 1:500, Stefan Thor, University of  
254 Queensland, Brisbane, Australia) and t-GRASP signal (rabbit GFP G10362, 1:300, Invitrogen). Secondary  
255 antibodies were from Jackson ImmunoResearch (Donkey, 1:400, West Grove, PA). Confocal image stacks  
256 were acquired on a Zeiss 800 microscope. All images were processed in Fiji (<https://imagej.net/Fiji>) and  
257 Adobe Illustrator (Adobe, San Jose, CA). Images were processed as described previously (Carreira-Rosario et  
258 al., 2018). The primary neurites of Pair1 were traced using the Simple Neurite Tracer in Fiji.

259  
260  
261  
262  
263  
264  
265  
266  
267  
268  
269  
270  
271  
272  
273  
274  
275  
276  
277  
278  
279  
280  
281  
282  
283  
284  
285  
286  
287  
288  
289  
290  
291  
292  
293  
294  
295  
296  
297  
298  
299  
300  
301  
302

### Adult Behavioral Experiment

Adult behavior was assayed using two arenas, a closed loop arena (Figure 3) and an open field arena (Figure 3 – Supplement 1). For the closed loop arena, adult female flies 1 day after eclosion were transferred to standard cornmeal fly food supplemented with 100 mL 0.5 mM ATR or 100% ethanol for 4 days (changed every 2 days). Animals, with intact wings, were starved for 4 hrs and then placed in arenas and their behavior was recorded as described previously (Carreira-Rosario et al., 2018). Flies were exposed to low transmitted light, red light, and low transmitted light again for 30 sec each. This was done three times for each animal. To calculate different parameters, the recorded videos were tracked and analyzed using the CalTech Fly Tracker (Fontaine et al., 2009) and JABA (Kabra et al., 2013). The speed, distance and behavior reported were specific to the first trial. The reported speeds are the average speed of each second. The pausing probability was calculated as previously described (Carreira-Rosario et al., 2018). “Pre” defines the 30 secs prior to red light exposure, “light” defines the 30 secs of red light exposure and “post” defines the 30 secs after red light exposure. Immobile movements were defined as the fly not translocating and not moving other body parts. Small movements were defined as the fly not translocating but moving body parts (i.e. grooming, moving wings). Large movements were defined as the fly translocating its body. All behavior measures were normalized by dividing them by the group average “pre” values.

For the open field arena, adult flies were fed ATR and vehicle as described above. 3 animals were placed in a circular arena with a diameter of 14.5 cm and height of 0.5 cm. After 5 min for environmental acclimation, animal behavior was recorded at 25 FPS using a Basler aCA2040-25gm GigE camera under infrared light for 4 sec followed by 4 secs under red light and another 4 sec under infrared light, as described previously (Risse et al., 2013). The was repeated 3 times, and tracked and analyzed as described above.

### Statistics

All statistical analysis (t-test, one-way and two-way ANOVA with Bonferroni’s multiple comparison tests) were performed with Prism 9 (GraphPad software, San Diego, CA). Numerical data in graphs show individual measurements (animals), means (represented by red bars) or means  $\pm$  S.E.M. (dashed lined), when appropriate. The number of replicates (n) is indicated for each data set in the corresponding legend.

### Acknowledgements

We thank John Reinitz, Claude Desplan, and Stefan Thor for antibodies; Barry Dickson, Matthieu Loius, and Vivek Jayaraman for fly stocks. Transgenic lines were generated by BestGene (Chino Hills, CA) or Genetivision (Houston, TX). Stocks obtained from the Bloomington Drosophila Stock Center (NIH P40OD018537) were used in this study. We thank Dr. Sen-Lin Lai for the immortalization fly stock, and Sen-Lin Lai, Emily Heckman, and Arnaldo Carreira-Rosario for comments on the manuscript. Funding was provided by HHMI (CQD, KML).

### Competing Interests

None.

### Additional Information

#### Funder

Howard Hughes Medical Institute

#### Grant reference number

None

#### Author

Chris Doe, Kristen Lee

303 **Figure legends**

304

305 **Figure 1. The Pair1 neuron persists from larval to adult stages.**

306 (A-B) Pair1 neurons (cell body: yellow asterisk; neurites: yellow arrowhead) in the larval CNS (gray outline) at  
307 28h ALH (A) and 96h ALH (B). Here and in subsequent panels are maximum intensity projections of  
308 confocal sections containing the Pair1 neurons; anterior, up; dorsal view. Significant 'off-target' expression  
309 marked with white arrowheads. Scale bar, 50  $\mu\text{m}$ . (A'-B') Enlargement of the brain regions boxed in A,B.  
310 Scale bar, 20  $\mu\text{m}$ . (A''-B'') Tracing to show Pair1 neuron morphology. Genotype: +; *UAS-myr::GFP*; *R75C02-*  
311 *Gal4*.

312 (C-D) Pair1 neurons (cell body: yellow asterisk; neurites: yellow arrowhead) in the pupal CNS (gray outline) at  
313 24h APF (C) and 96h APF (D). Significant 'off-target' expression marked with white arrowheads. Scale bar,  
314 50  $\mu\text{m}$ . (C'-D') Enlargement of the brain regions boxed in C, D; cell body: yellow asterisk, neurites: yellow  
315 arrowhead. Scale bar, 10  $\mu\text{m}$ . (C'') Tracing to show Pair1 neuron morphology. (D'') Focal plane showing  
316 Pair1 cell bodies (region boxed in D', cell body marked with yellow asterisks). Scale bar, 10  $\mu\text{m}$ . (D''') Tracing  
317 to show Pair1 neuron morphology. Note that Pair1 can be followed to T1 in the 3D confocal stack but is  
318 difficult to represent here due to fasciculation of Pair1 with off-target neurons. Genotype: +; *UAS-myr::GFP*;  
319 *R75C02-Gal4*.

320 (E) Pair1 neurons (cell body: yellow asterisk; neurites: yellow arrowhead) in the 4d adult CNS (gray outline)  
321 Significant 'off-target' expression marked with white arrowheads. Scale bar, 50  $\mu\text{m}$ . (E') Enlargement of the  
322 brain region boxed in E. Scale bar, 10  $\mu\text{m}$ . (E'') Focal plane showing Pair1 cell bodies (region boxed in E',  
323 cell body marked with yellow asterisks). Scale bar, 10  $\mu\text{m}$ . (E''') Tracing to show Pair1 neuron morphology.  
324 Genotype: +; *UAS-myr::GFP*; *R75C02-Gal4*.

325 (F) Pair1 neurons (cell body: yellow asterisk; neurites: yellow arrowhead) permanently labeled at 96h ALH  
326 and visualized in the 4d old adult. See methods for details. Significant 'off-target' expression marked with  
327 white arrowheads. Scale bar, 50  $\mu\text{m}$ . (F') Enlargement of the brain region boxed in F; Pair1 cell body: yellow  
328 asterisk; Pair1 neurites: yellow arrowhead. Scale bar, 10  $\mu\text{m}$ . (F'') Focal plane showing Pair1 cell bodies  
329 (region boxed in F', cell body marked with yellow asterisks). Scale bar, 10  $\mu\text{m}$ . (F''') Tracing to show Pair1  
330 neuron morphology. Genotype: *Hs-KD,3xUAS-FLP*; *13xLexAop(KDRT.Stop)myr::smGdP-Flag* +;  
331 *13xLexAop(KDRT.Stop)myr::smGdP-V5*, *13xLexAop(KDRT.Stop)myr::smGdP-HA*, *nSyb(FRT.Stop)LexA::p65*  
332

333 **Figure 1 – Supplement 1. MDN axon and Pair1 dendrite target the same neuropil in the larval brain.**

334 The TEM volume of the newly hatched larva "Seymore" showing the axon (green) and dendrite (blue)  
335 domains of a single MDN and Pair1 neuron defined by the location of pre- and postsynapses. Left: MDN  
336 axon and dendrite domains. Middle: Pair1 axon and dendrite domains. Right: MDN axon and Pair1 dendrite  
337 are closely entwined the same region of neuropil (white bracket).  
338

339 **Figure 2. The Pair1 neuron expresses the same molecular markers at larval and adult stages.**

340 (A) Schematic of the larval brain showing region of Pair1 neurons (red box) enlarged in panels below.  
341 Anterior up, dorsal view.

342 (B-G) Larval Pair1 neurons (left column), indicated markers (middle column), and merge (right column) at  
343 28h ALH. In some cases the second Pair1 neuron is out of the focal plane, but both Pair1 neurons always  
344 have the same gene expression profile. Markers detect the following transcription factors: Hb, Hunchback;  
345 Scr, Sex combs reduced; Bcd, Bicoid; Vsx1, Visual system homeobox 1; and Nab. Scale bar, 5  $\mu\text{m}$ . (G)  
346 Summary: marker expression matches that in adults. Genotype: +; *UAS-myr::GFP*; *R75C02-Gal4*.



347 (H) Schematic of the adult brain showing region of Pair1 neurons (red box) enlarged in panels below.  
348 Anterior up, dorsal view.

349 (I-N) Adult Pair1 neurons (left column), indicated markers (middle column), and merge (right column) in 4d  
350 old adult. Scale bar, 5  $\mu$ m. (N) Summary: marker expression matches that in larvae. Genotype: +; *UAS-*  
351 *myr::GFP*; *R75C02-Gal4*.

352

353 **Figure 3. Pair1 activation for 30s arrests forward locomotion but does not cause paralysis in adults**

354 (A) Speed (mm/sec) of adult flies expressing Chrimson in Pair1 neurons following neuronal activation  
355 (+ATR, blue) or no activation (vehicle control, black) in a closed loop arena. Speed was recorded for the 30s  
356 prior to activation, the 30s light-induced activation (red stipple), and 30s after activation. Mean  $\pm$  S.E.M, n =  
357 10. Genotype for this and all subsequent panels: *UAS-CsChrimson::mVenus*; +; *R75C02-Gal4*.

358 (B) Probability of forward locomotion pausing upon light-induced Pair1 activation (ATR treatment, blue)  
359 compared to vehicle control (black). Statistics: t-test,  $p < 0.001$ ; n = 10.

360 (C) Total distance traveled pre-light stimulus (“pre”), during the light stimulus (“light”) and post-light  
361 stimulus (“post”) (terminology used here and in subsequent panels) of flies fed ATR (Pair1 activation, blue)  
362 compared to controls (fed vehicle, no Pair1 activation, black). Statistics: two-way ANOVA: drug treatment,  
363  $F(1, 18) = 111.3$ ,  $p < 0.0001$ ; time,  $F(1.867, 33.61) = 47.03$ ,  $p < 0.0001$ ; interaction  $F(2, 26) = 38.24$ ,  $p <$   
364  $0.001$ ; Bonferroni’s multiple comparisons between drug treatments within each timepoint: pre,  $p > 0.9999$ ;  
365 light,  $p < 0.0001$ ; post,  $p = 0.0001$ ; n = 10.

366 (D) Percent time doing large movements (whole body translocation, light grey), small movements (body part  
367 movement but no translocation, dark grey) or no movements (immobile, black) of flies fed vehicle (left side)  
368 or ATR (right side) during each time phase (pre, light, post).

369 (E) Normalized duration of time spent immobile during each timepoint (pre, light, post) for flies fed ATR  
370 (Pair1 activation, blue) compared to controls fed vehicle (black). Statistics: two-way ANOVA: drug treatment,  
371  $F(1, 18) = 112.8$ ,  $p < 0.0001$ ; time,  $F(1.930, 34.74) = 25.55$ ,  $p < 0.0001$ ; interaction,  $F(2, 36) = 27.81$ ,  $p <$   
372  $0.0001$ ; Bonferroni’s multiple comparisons between drug treatments within each timepoint: pre,  $p > 0.9999$ ;  
373 light,  $p < 0.0001$ ; post,  $p = 0.0022$ ; n = 10.

374 (F) Normalized duration of time spent doing small movements during each timepoint (pre, light, post) for  
375 flies fed ATR (Pair1 activation, blue) compared to controls fed vehicle (black). Statistics: two-way ANOVA:  
376 drug treatment,  $F(1, 18) = 5.111$ ,  $p = 0.036$ ; time,  $F(1.923, 34.62) = 10.82$ ,  $p = 0.0003$ ; interaction,  $F(2, 36) =$   
377  $4.225$ ,  $p = 0.0225$ ; Bonferroni’s multiple comparisons between drug treatments within each timepoint: pre,  $p$   
378  $> 0.9999$ ; light,  $p = 0.0022$ ; post,  $p > 0.9999$ ; n = 10.

379 (G) Normalized duration of time spent doing large movements during each time phase (pre, light, post) for  
380 flies fed ATR (Pair1 activation, blue) compared to controls fed vehicle (black). Statistics: two-way ANOVA:  
381 drug treatment,  $F(1, 18) = 53.56$ ,  $p < 0.0001$ ; time,  $F(1.869, 33.64) = 53.44$ ,  $p < 0.0001$ ; interaction,  $F(2, 36)$   
382  $= 52.20$ ,  $p < 0.0001$ ; Bonferroni’s multiple comparisons between drug treatments within each timepoint: pre,  
383  $p > 0.9999$ ; light,  $p < 0.0001$ ; post,  $p = 0.0074$ ; n = 10.

384

385 **Figure 3 – Supplement 1. Pair1 activation for 4s arrests forward locomotion but does not cause**  
386 **paralysis in adults in an open field arena**

387 (A) Speed (mm/sec) of adult flies in an open field arena. Flies were fed food supplemented with ATR (blue)  
388 or ethanol (vehicle, black). Red square represents the presentation of the light stimulus.

389 (B) Probability of pausing upon light activation of Pair1 (ATR treatment, blue) compared to controls (vehicle  
390 treatment, black) (t-test,  $p < 0.001$ ; n = 12).

391

392 **Figure 4. MDN and Pair1 are synaptic partners in adults**

393 (A, B) MDN neurons (A) and Pair1 neurons (B) in the adult central brain. Neurons are in white, nc82  
394 counterstain in magenta for whole brain orientation; cell bodies marked by yellow arrowheads. Here and in  
395 subsequent panels shows maximum intensity projection of volume; anterior, up; dorsal view. Scale bar, 50  
396  $\mu\text{m}$ . Genotype: *UAS-mCD8::RFP, LexAop-mCD8::GFP; VT044845-LexA; R75C02-Gal4*  
397 (C-E) MDN neurites (C), Pair1 neurites (D), and merge (E) in the subesophageal ganglion (red box in  
398 schematic). Scale bar, 10  $\mu\text{m}$ . Genotype: *UAS-mCD8::RFP, LexAop-mCD8::GFP; VT044845-LexA; R75C02-*  
399 *Gal4*.  
400 (F) No detectable t-GRASP signal was observed in the subesophageal ganglion without expression of the pre-  
401 t-GRASP fragment in MDN. Scale bar, 10  $\mu\text{m}$ . Genotype: ; *LexAop-pre-t-GRASP, UAS-post-t-*  
402 *GRASP/R75C02-Gal4*.  
403 (G) t-GRASP signals between MDN and Pair1 were observed in the subesophageal ganglion. Scale bar, 10  
404  $\mu\text{m}$ . Genotype: ; *VT044845-LexA; LexAop-pre-t-GRASP, UAS-post-t-GRASP/R75C02-Gal4*.

405  
406 **Figure 5. Model describing the MDN-Pair1 circuit in larval and adult stages**

407 In the larva, activation of MDN by upstream sensory neurons activates backward crawling and inhibits  
408 forward crawling. MDN neurons synapse onto A18b and Pair1 interneurons. A18b subsequently regulates  
409 backward crawling by synapsing onto motor neurons. Pair1 synapses onto and inhibits the pre-motor neuron  
410 A27h, which generates forward locomotion when activated. In the adult, activation of MDN by upstream  
411 sensory neurons activated backward walking and inhibits forward walking. MDN neurons synapse onto  
412 LBL40, LUL120 and Pair1. Activation of LBL40 and LUL130 generates backward walking. Activation of  
413 Pair1 generates a pausing behavior, likely through the inhibition of neurons generating forward locomotion.  
414 In both larvae and adult, MDN and Pair1 neurons (blue) persist and function as a core circuit to regulate  
415 locomotion.

416 **References**

- 417
- 418 Barendse MEA, Simmons JG, Byrne ML, Seal ML, Patton G, Mundy L, Wood SJ, Olsson CA, Allen NB, Whittle S. 2018.  
419 Brain structural connectivity during adrenarche: Associations between hormone levels and white matter  
420 microstructure. *Psychoneuroendocrinology* **88**:70–77. doi:10.1016/j.psyneuen.2017.11.009
- 421 Bidaye SS, Laturney M, Chang AK, Liu Y, Bockemühl T, Büschges A, Scott K. 2020. Two Brain Pathways Initiate Distinct  
422 Forward Walking Programs in *Drosophila*. *Neuron* **108**:469–485.e8. doi:10.1016/j.neuron.2020.07.032
- 423 Bidaye SS, Machacek C, Wu Y, Dickson BJ. 2014. Neuronal control of *Drosophila* walking direction. *Science* **344**:97–  
424 101. doi:10.1126/science.1249964
- 425 Carreira-Rosario A, Zarin AA, Clark MQ, Manning L, Fetter RD, Cardona A, Doe CQ. 2018. MDN brain descending  
426 neurons coordinately activate backward and inhibit forward locomotion. *Elife* **7**. doi:10.7554/eLife.38554
- 427 Consoulas C, Duch C, Bayline RJ, Levine RB. 2000. Behavioral transformations during metamorphosis: remodeling of  
428 neural and motor systems. *Brain Res Bull* **53**:571–583. doi:10.1016/s0361-9230(00)00391-9
- 429 Consoulas C, Restifo LL, Levine RB. 2002. Dendritic remodeling and growth of motoneurons during metamorphosis of  
430 *Drosophila melanogaster*. *J Neurosci* **22**:4906–17.
- 431 Eichler K, Li F, Litwin-Kumar A, Park Y, Andrade I, Schneider-Mizell CM, Saumweber T, Huser A, Eschbach C, Gerber B,  
432 Fetter RD, Truman JW, Priebe CE, Abbott LF, Thum AS, Zlatić M, Cardona A. 2017. The complete connectome  
433 of a learning and memory centre in an insect brain. *Nature* **548**:175–182. doi:10.1038/nature23455
- 434 Feng K, Sen R, Minegishi R, Dübber M, Bockemühl T, Büschges A, Dickson BJ. 2020. Distributed control of motor  
435 circuits for backward walking in *Drosophila*. *Nat Commun* **11**:6166. doi:10.1038/s41467-020-19936-x
- 436 Fontaine EI, Zabala F, Dickinson MH, Burdick JW. 2009. Wing and body motion during flight initiation in *Drosophila*  
437 revealed by automated visual tracking. *J Exp Biol* **212**:1307–1323. doi:10.1242/jeb.025379
- 438 Fushiki A, Zwart MF, Kohsaka H, Fetter RD, Cardona A, Nose A. 2016. A circuit mechanism for the propagation of waves  
439 of muscle contraction in *Drosophila*. *eLife* **5**. doi:10.7554/eLife.13253
- 440 Kabra M, Robie AA, Rivera-Alba M, Branson S, Branson K. 2013. JAABA: interactive machine learning for automatic  
441 annotation of animal behavior. *Nat Methods* **10**:64–67. doi:10.1038/nmeth.2281
- 442 Kanamori T, Togashi K, Koizumi H, Emoto K. 2015. Chapter One - Dendritic Remodeling: Lessons from Invertebrate  
443 Model Systems In: Jeon KW, editor. *International Review of Cell and Molecular Biology*. Academic Press. pp. 1–  
444 25. doi:10.1016/bs.ircmb.2015.05.001
- 445 Kuner R, Flor H. 2017. Structural plasticity and reorganisation in chronic pain. *Nat Rev Neurosci* **18**:113.  
446 doi:10.1038/nrn.2017.5
- 447 Levine RB. 1984. Changes in neuronal circuits during insect metamorphosis. *J Exp Biol* **112**:27–44.
- 448 Li F, Lindsey JW, Marin EC, Otto N, Dreher M, Dempsey G, Stark I, Bates AS, Pleijzier MW, Schlegel P, Nern A,  
449 Takemura S-Y, Eckstein N, Yang T, Francis A, Braun A, Parekh R, Costa M, Scheffer LK, Aso Y, Jefferis GS,  
450 Abbott LF, Litwin-Kumar A, Waddell S, Rubin GM. 2020. The connectome of the adult *Drosophila* mushroom  
451 body provides insights into function. *eLife* **9**. doi:10.7554/eLife.62576
- 452 Marin EC, Watts RJ, Tanaka NK, Ito K, Luo L. 2005. Developmentally programmed remodeling of the *Drosophila*  
453 olfactory circuit. *Development* **132**:725–37. doi:10.1242/dev.01614
- 454 Mills KL, Goddings A-L, Herting MM, Meuwese R, Blakemore S-J, Crone EA, Dahl RE, Güroğlu B, Raznahan A, Sowell  
455 ER, Tamnes CK. 2016. Structural brain development between childhood and adulthood: Convergence across  
456 four longitudinal samples. *NeuroImage* **141**:273–281. doi:10.1016/j.neuroimage.2016.07.044
- 457 Patel D, Kas MJ, Chattarji S, Buwalda B. 2019. Rodent models of social stress and neuronal plasticity: Relevance to  
458 depressive-like disorders. *Behav Brain Res* **369**:111900. doi:10.1016/j.bbr.2019.111900
- 459 Ren Q, Awasaki T, Huang Y-F, Liu Z, Lee T. 2016. Cell Class-Lineage Analysis Reveals Sexually Dimorphic Lineage  
460 Compositions in the *Drosophila* Brain. *Curr Biol* **26**:2583–2593. doi:10.1016/j.cub.2016.07.086
- 461 Riddiford LM. 1980. Insect endocrinology: action of hormones at the cellular level. *Annu Rev Physiol* **42**:511–528.  
462 doi:10.1146/annurev.ph.42.030180.002455
- 463 Riddiford LM, Hiruma K, Zhou X, Nelson CA. 2003. Insights into the molecular basis of the hormonal control of molting  
464 and metamorphosis from *Manduca sexta* and *Drosophila melanogaster*. *Insect Biochem Mol Biol* **33**:1327–  
465 1338. doi:10.1016/j.ibmb.2003.06.001

- 466 Risse B, Thomas S, Otto N, Lopmeier T, Valkov D, Jiang X, Klambt C. 2013. FIM, a novel FTIR-based imaging method  
467 for high throughput locomotion analysis. *PLoS One* **8**:e53963. doi:10.1371/journal.pone.0053963
- 468 Sen R, Wu M, Branson K, Robie A, Rubin GM, Dickson BJ. 2017. Moonwalker Descending Neurons Mediate Visually  
469 Evoked Retreat in *Drosophila*. *Curr Biol* **27**:766–771. doi:10.1016/j.cub.2017.02.008
- 470 Shearin HK, Quinn CD, Mackin RD, Macdonald IS, Stowers RS. 2018. t-GRASP, a targeted GRASP for assessing  
471 neuronal connectivity. *J Neurosci Methods* **306**:94–102. doi:10.1016/j.jneumeth.2018.05.014
- 472 Sisk CL, Zehr JL. 2005. Pubertal hormones organize the adolescent brain and behavior. *Front Neuroendocrinol* **26**:163–  
473 174. doi:10.1016/j.yfrne.2005.10.003
- 474 Tastekin I, Khandelwal A, Tadres D, Fessner ND, Truman JW, Zlatic M, Cardona A, Louis M. 2018. Sensorimotor  
475 pathway controlling stopping behavior during chemotaxis in the *Drosophila melanogaster* larva. *eLife* **7**.  
476 doi:10.7554/eLife.38740
- 477 Truman JW. 1992. Developmental neuroethology of insect metamorphosis. *J Neurobiol* **23**:1404–1422.  
478 doi:10.1002/neu.480231005
- 479 Truman JW, Reiss SE. 1976. Dendritic reorganization of an identified motoneuron during metamorphosis of the tobacco  
480 hornworm moth. *Science* **192**:477–479. doi:10.1126/science.1257782
- 481 Weeks JC. 2003. Thinking globally, acting locally: steroid hormone regulation of the dendritic architecture, synaptic  
482 connectivity and death of an individual neuron. *Prog Neurobiol* **70**:421–442. doi:10.1016/s0301-0082(03)00102-  
483 3
- 484 Witvliet D, Mulcahy B, Mitchell JK, Meirovitch Y, Berger DR, Wu Y, Liu Y, Koh WX, Parvathala R, Holmyard D, Schalek  
485 RL, Shavit N, Chisholm AD, Lichtman JW, Samuel ADT, Zhen M. 2020. Connectomes across development  
486 reveal principles of brain maturation in *C. elegans*. *bioRxiv* 2020.04.30.066209. doi:10.1101/2020.04.30.066209
- 487 Yaniv SP, Schuldiner O. 2016. A fly's view of neuronal remodeling. *Wiley Interdiscip Rev Dev Biol* **5**:618–635.  
488 doi:10.1002/wdev.241
- 489 Yu F, Schuldiner O. 2014. Axon and dendrite pruning in *Drosophila*. *Curr Opin Neurobiol* **27**:192–8.  
490 doi:10.1016/j.conb.2014.04.005
- 491
- 492

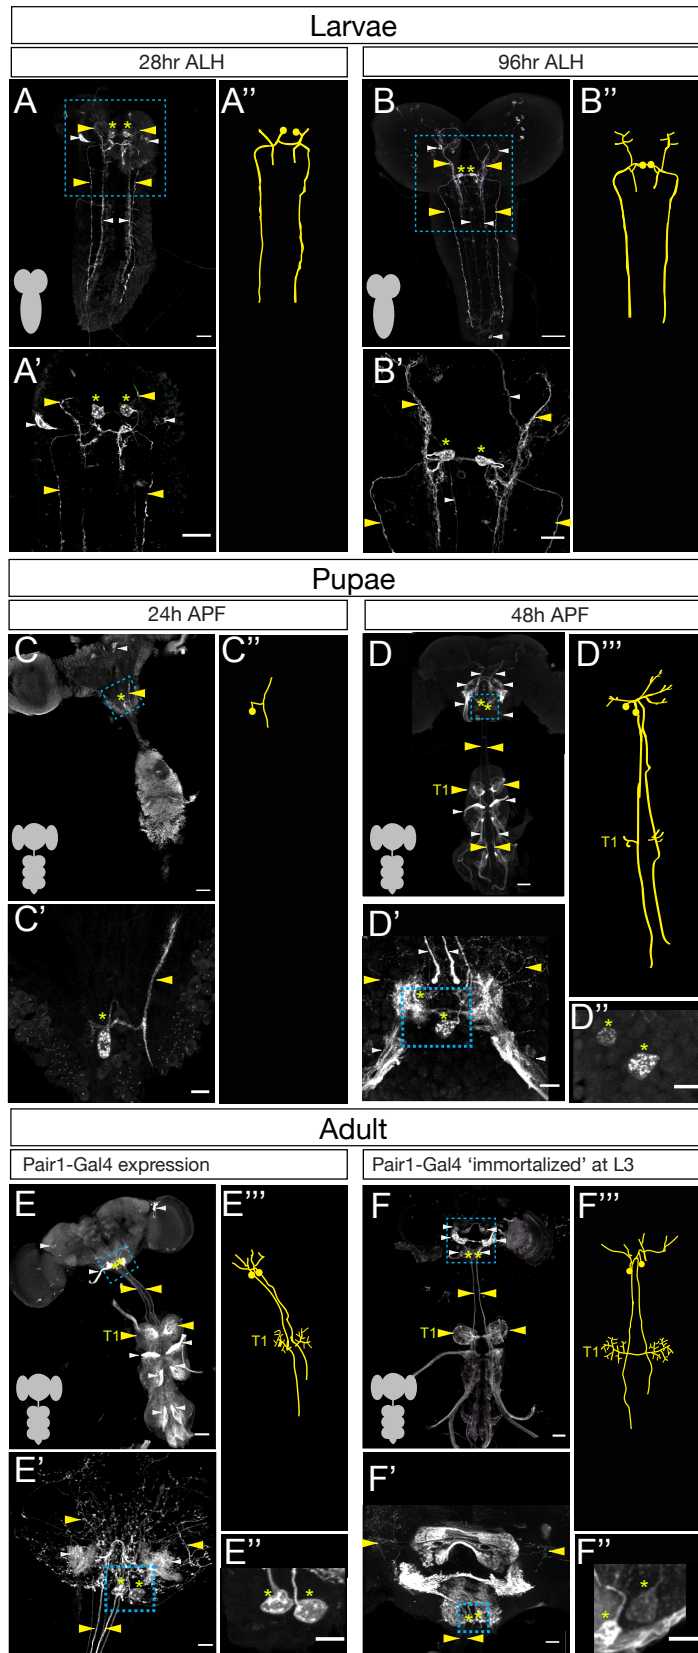

Figure 1

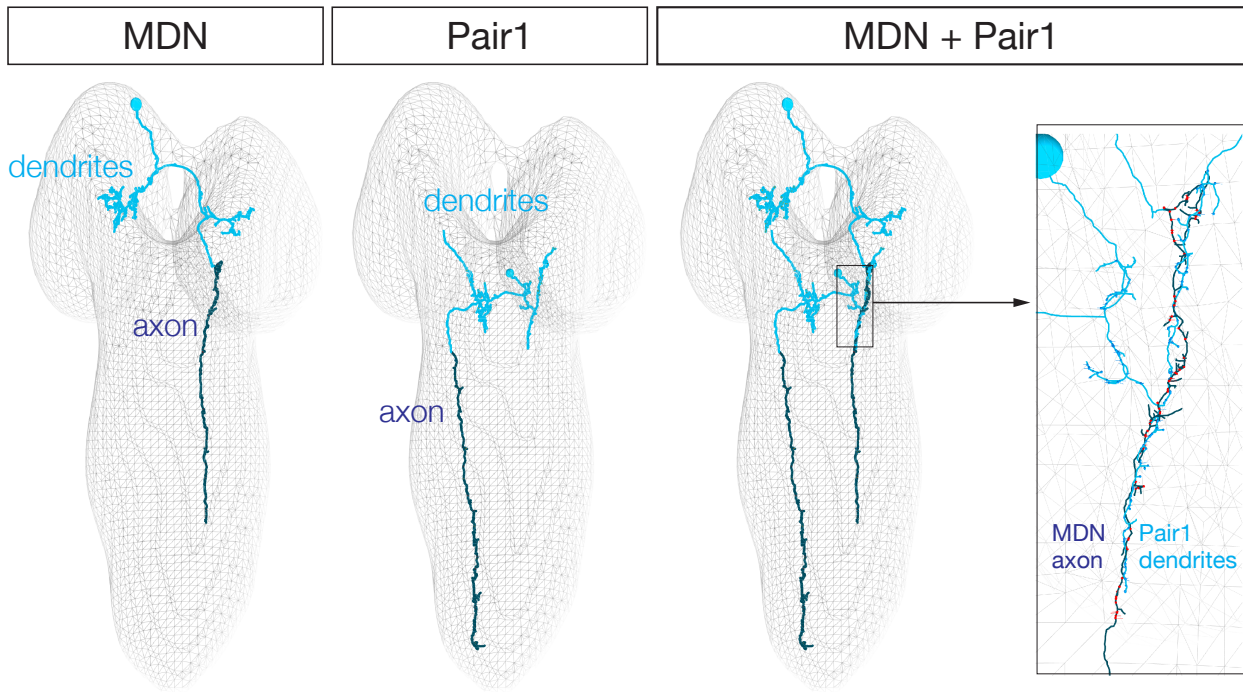

Figure 1 - supplement 1

494

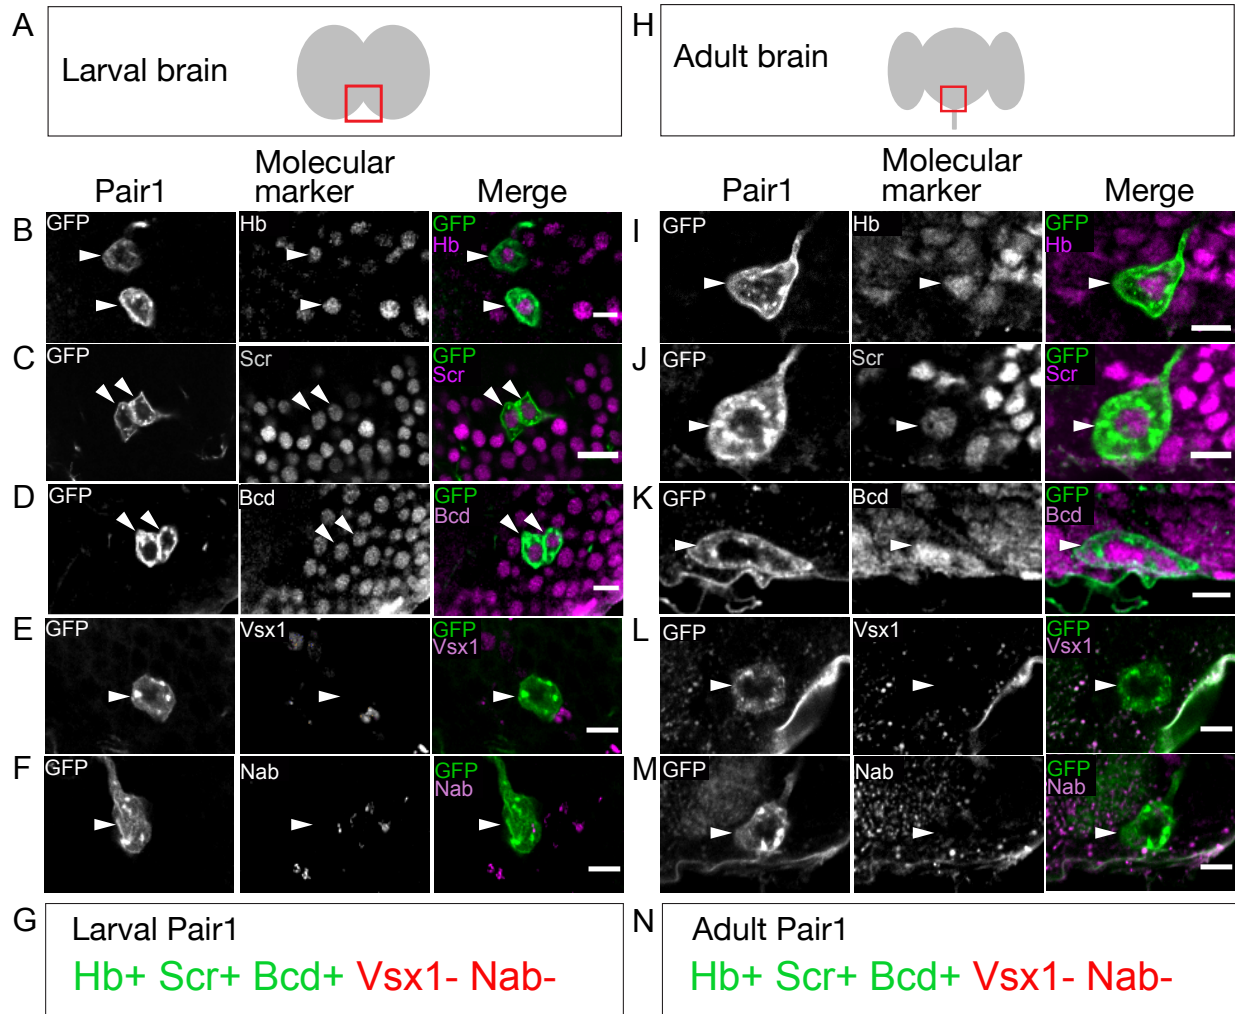

Figure 2

495

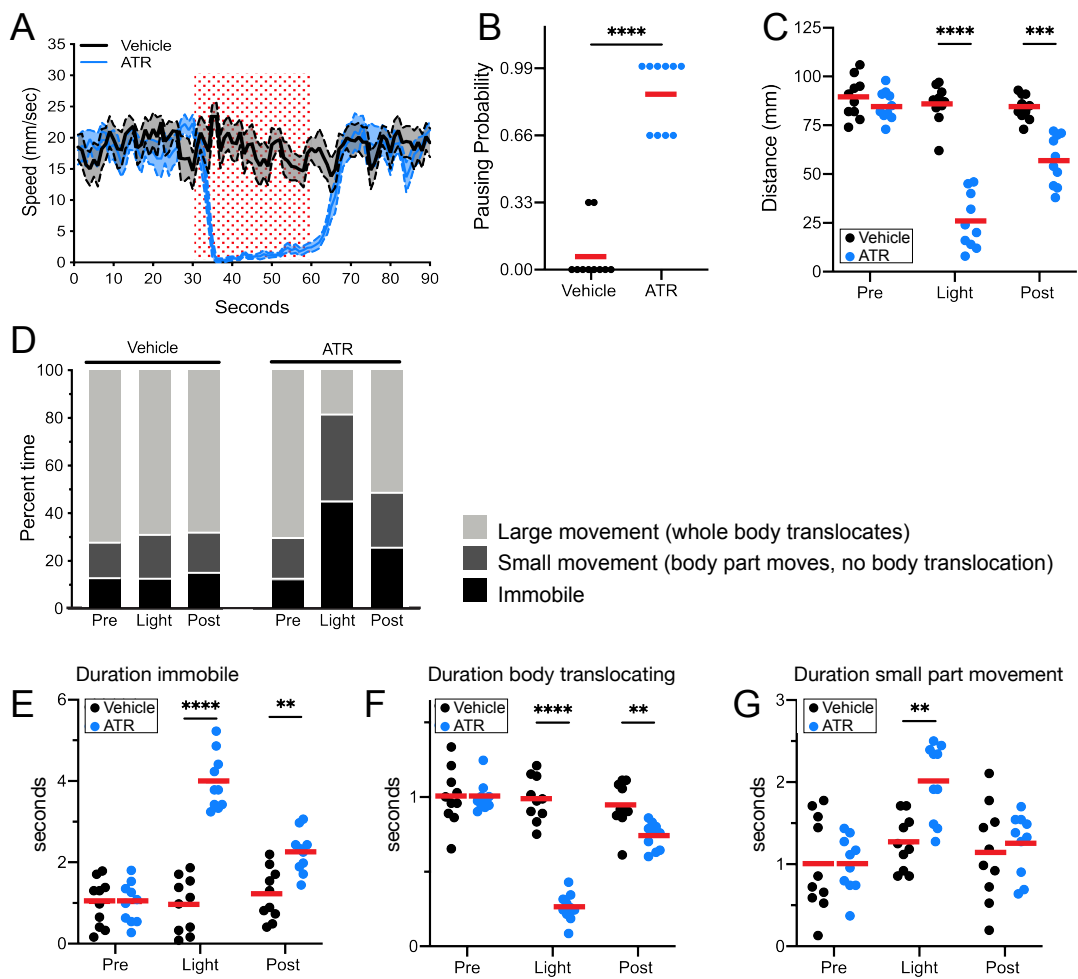

Figure 3

496  
497  
498  
499  
500  
501  
502  
503

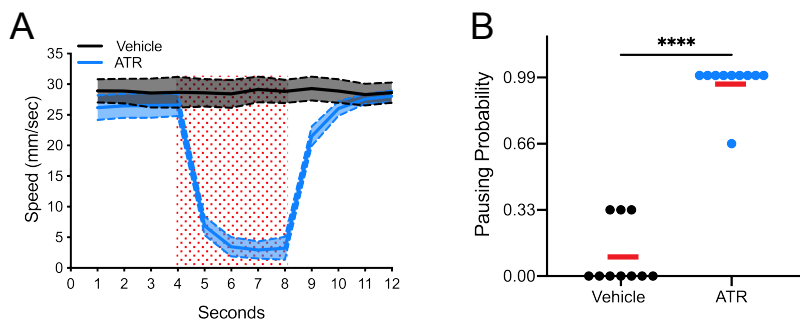

Figure 3 - Supplement 1

504



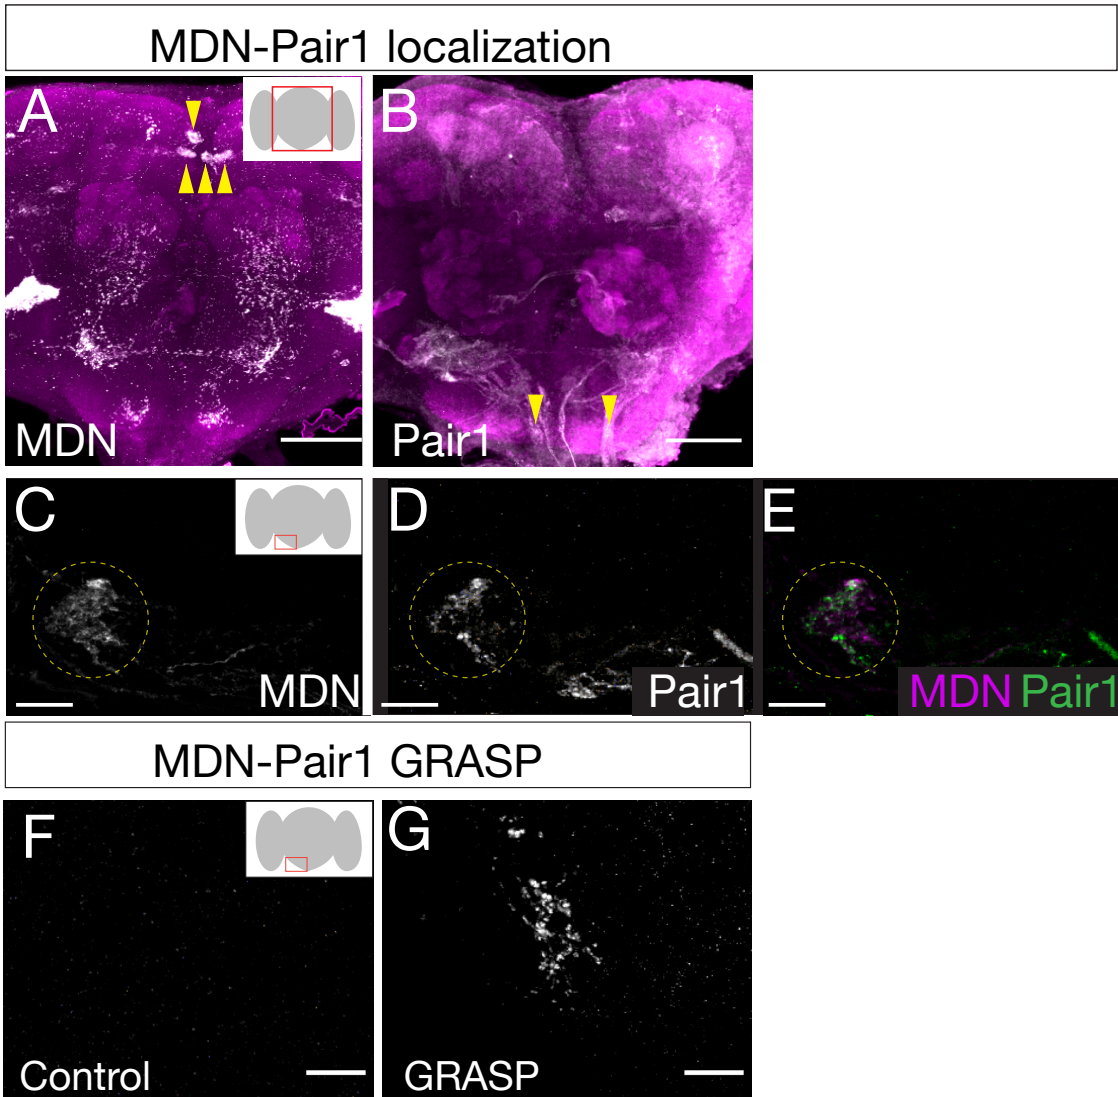

Figure 4

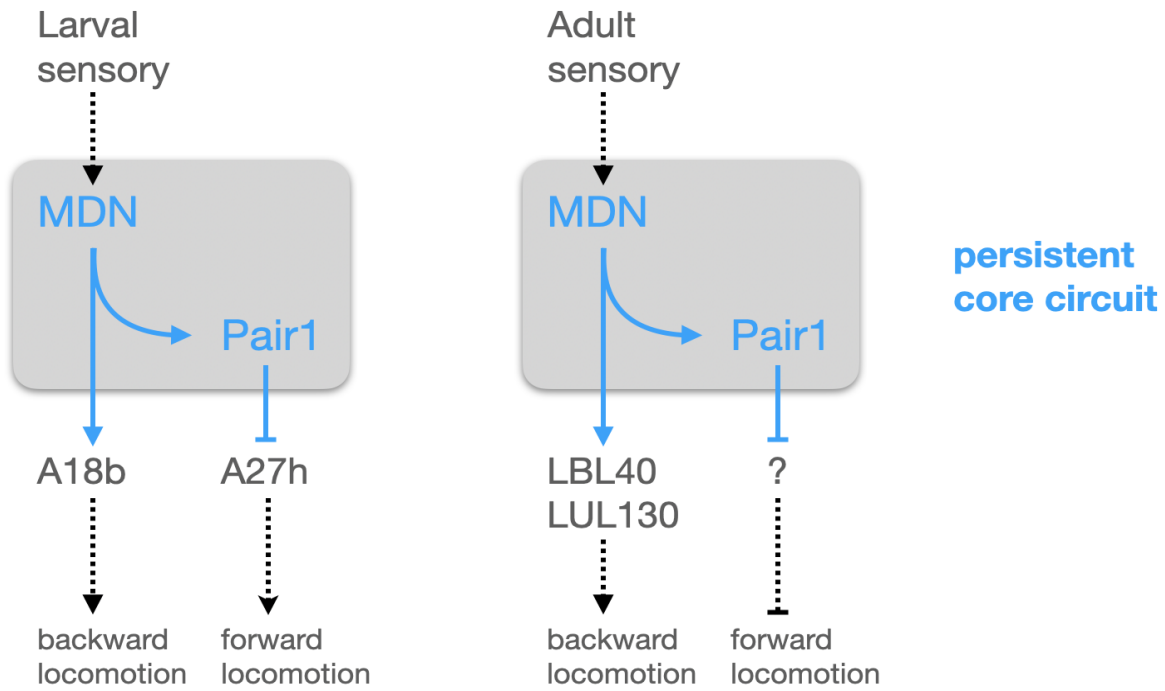

Figure 5

506
